# Supplementary material for: EGF-Enhanced GnRH-II Regulation in Decidual Stromal Cell Motility through Twist and N-Cadherin Signaling
Source: MDPI journal article supplement (doi:10.3390/ijms242015271), 2023-10-17
Supplement: s1 [file s1]

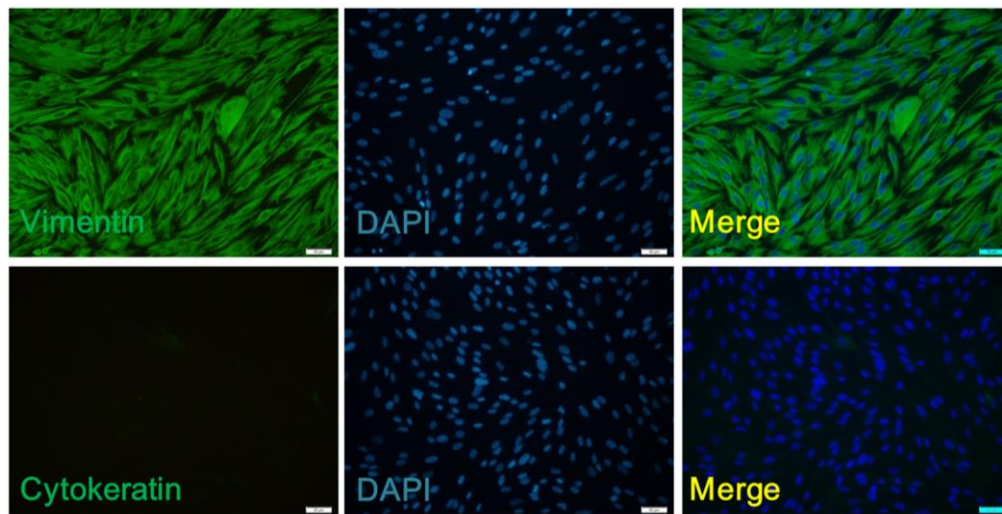

**Supplementary Figure S1. Primary decidual endometrial stromal cell identification.** Isolated stromal cells were stained with stromal cell marker vimentin and epithelium cell marker CK to demonstrate their purity. Magnification,  $\times 200$ . CK, cytokeratin.
